# Supplementary material for: Integrated Valorization of Bamboo waste via Integrated Torrefaction and Anaerobic Digestion: Energy Recovery and Techno-Economic Assessment
Source: Research Square preprint supplement (doi:10.21203/rs.3.rs-8610734/v1), 2026-01-28
Supplement: Supplementary file 1 [file eba22d02ce988aabf4961a89.docx]

**Integrated Valorization of Bamboo waste via Integrated Torrefaction and Anaerobic Digestion: Energy Recovery and Techno-Economic Assessment**

Himanshu Kachroo a, b, Tharaka Rama Krishna C. Doddapaneni c, Priyanka Kaushal d, Sabine Kutschke b, Rohan Jain b*

a School of Interdisciplinary Research, Indian Institute of Technology Delhi, Hauz Khas, New Delhi-110016, India

b Helmholtz Institute Freiberg for Resource Technology, Helmholtz-Zentrum Dresden-Rossendorf, Bautzner Landstraße 400, 01328, Dresden, Germany

c Renewable and Sustainable Energy Research Center, Technology Innovation Institute, Masdar City, Abu Dhabi, United Arab Emirates

d Clean Energy Laboratory, Centre for Rural Development and Technology, Indian Institute of Technology Delhi, Hauz-Khas, New Delhi – 110016, India

* Corresponding author

Dr. Rohan Jain

Helmholtz-Zentrum Dresden-Rossendorf,

Helmholtz Institute Freiberg for Resource Technology,

Bautzner Landstraße 400,

01328, Dresden, Germany

E-Mail: [r.jain@hzdr.de](mailto:r.jain@hzdr.de), [rohanjain.iitd@gmail.com](mailto:rohanjain.iitd@gmail.com)

Phone no: - 00 49 351 260 2725

**Supplementary information**

**2. Results**

**2.4. Mass and energy distribution**

**Table S1. Mass distribution of bamboo waste at different temperatures (residence time: 60 minutes, heating rate: 10 °C/min).**

| **Temperature (°C)** | **Input (kg)** | **Total input (kg)** | **Output (kg)** | | |
| --- | --- | --- | --- | --- | --- |
| **Biomass** | **Bio-coal** | **Condensate** | **Tor-gas** |
| 215 | 1 | 1 | 0.82 | 0.09 | 0.05 |
| 230 | 1 | 1 | 0.75 | 0.13 | 0.08 |
| 245 | 1 | 1 | 0.69 | 0.17 | 0.09 |
| 260 | 1 | 1 | 0.65 | 0.20 | 0.11 |
| 275 | 1 | 1 | 0.61 | 0.24 | 0.13 |
| 290 | 1 | 1 | 0.58 | 0.28 | 0.13 |

**Table S2. Mass distribution of bamboo waste at different residence times (temperature: 290 °C, heating rate: 10 °C/min) .**

| **Durations (mins)** | **Input (kg)** | **Total input (kg)** | **Output (kg)** | | |
| --- | --- | --- | --- | --- | --- |
| **Biomass** | **Bio-coal** | **Condensate** | **Tor-gas** |
| 30 | 1 | 1 | 0.62 | 0.25 | 0.09 |
| 60 | 1 | 1 | 0.58 | 0.28 | 0.13 |
| 90 | 1 | 1 | 0.54 | 0.31 | 0.14 |

**Table S3. Energy distribution of bamboo waste at different temperatures (residence time: 60 minutes, heating rate: 10 °C/min).**

| **Temperature (°C)** | **Input (Mj)** | **Total input (Mj)** | **Output (Mj)** | | |
| --- | --- | --- | --- | --- | --- |
| **Biomass** | **Bio-coal** | **Condensate** | **Tor-gas** |
| 215 | 17.6 | 17.6 | 16.39 | 0.59 | 0.32 |
| 230 | 17.6 | 17.6 | 16.06 | 0.97 | 0.47 |
| 245 | 17.6 | 17.6 | 15.62 | 1.24 | 0.51 |
| 260 | 17.6 | 17.6 | 15.55 | 1.45 | 0.57 |
| 275 | 17.6 | 17.6 | 15.03 | 1.61 | 0.91 |
| 290 | 17.6 | 17.6 | 14.75 | 1.85 | 0.95 |

**Table S4. Energy distribution of bamboo waste at different residence times (temperature: 290 °C, heating rate: 10 °C/min).**

| **Duration (mins)** | **Input (Mj)** | **Total input (Mj)** | **Output (Mj)** | | |
| --- | --- | --- | --- | --- | --- |
| **Biomass** | **Bio-coal** | **Condensate** | **Tor-gas** |
| 30 | 17.6 | 17.6 | 14.94 | 1.62 | 0.89 |
| 60 | 17.6 | 17.6 | 14.75 | 1.85 | 0.95 |
| 90 | 17.6 | 17.6 | 14.07 | 2.25 | 1.12 |

**3. Discussion**

Tof-SIMS analysis revealed a homogenous trace metal distribution in bamboo-derived bio-coal, closely resembling the elemental uniformity observed in rice husk-derived bio-coal, which had previously been linked to enhanced metal ion mobility due to hemicellulose and cellulose removal [18-19]. This uniformity enhances combustion efficiency and reduces localized emissions. Compared to the rice husk bio-coal, bamboo bio-coal had a lower absolute ash content (~3wt%) (Table 3) and lower concentration gradients of problematic elements like Si and Fe (Fig. 4), reducing the likelihood of slagging and fouling during combustion [4, 12]. In contrast, rice husk bio-coal’s higher Si and Al content, despite being uniformly distributed, poses operational challenges in industrial settings due to high-temperature ash sintering [19]. More importantly, bamboo bio-coal exhibited superior metal integration without compromising structural homogeneity (Fig. 4), offering enhanced combustion uniformity and lower pollutant emissions [19]. This balance between elemental homogeneity and reduced inorganic load is a distinct advantage, making bamboo bio-coal a cleaner and more efficient solid fuel.

This comparison reinforces that metal migration and ash composition are critical parameters influenced by feedstock type, with direct implications for operational stability and maintenance in commercial bio-coal applications. Bamboo’s performance suggests it can offer advantages in industrial torrefaction-AD systems where fouling and slagging are limiting factors.

**Table S5: Comparison of torrefaction characteristics of rice husk, rice straw, and bamboo waste: bio-coal and condensate properties**

| **Parameter** | **Rice husk [18]** | **Rice straw [18]** | **Bamboo waste** |
| --- | --- | --- | --- |
| Bio-coal moisture reduction | ~92% | ~92% | ~92% |
| Bio-coal volatile matter reduction | ~48% | ~51% | ~66% |
| Bio-coal fixed carbon increase | 12.0 0.3% to 36.0 0.5% | 8.0 0.2% to 28.0 0.3% | 16.0 0.4% to 30.0 0.6% |
| Bio-coal ash content increase | 14.0 0.4% to 17.0 0.5% | 16.0 0.5% to 18.0 0.2% | 2.0 0.2% to 3.0 0.4% |
| Bio-coal HHV increment | 16.0 0.1 to 22.3 0.5 MJ/kg | 13.7 0.1 to 18.2 0.3 MJ/kg | 17.6 0.4 MJ/kg to 25.4 1.5 MJ/kg |
| Bio-coal thermal decomposition peak | Higher than untreated feedstocks (~320 °C) | Higher than untreated feedstocks (~320 °C) | Higher than untreated bamboo (~315 °C) |
| Bio-coal atomic carbon increase | ~36% | ~34% | ~38% |
| Bio-coal atomic oxygen decrement | ~44%` | ~37% | ~53% |
| Hemicellulose reduction | 98.0 0.3% | 80.0 0.6% | 99.0 0.4% |
| Cellulose reduction | 37.0 0.5% | 32.0 0.8% | 45.0 2.6% |
| Elemental distribution (Tof-SIMS) | Homogenous | Heterogenous | Homogenous across the bulk |
| Condensate pH | 2.5 0.3 | 2.7 0.2 | 2 0.2 |
| Condensate HHV | 10.8 0.5 MJ/kg | 9.9 0.4 MJ/kg | 11.4 0.3 MJ/kg |
| Condensate organic acids concentration | Acetic acid: 4.0 0.18 wt%, Lactic acid: 1.6 0.11 wt%, Formic acid: 1.6 0.03 wt% | Acetic acid: 3.5 0.02 wt%, Lactic acid: 1.1 0.06 wt%, Formic acid: 1.9 0.02 wt% | Acetic acid: 3.8 0.02 wt%, Lactic acid: 1.4 0.03 wt%, Formic acid: 1.7 0.05 wt% |
| Condensate biomethane yield | 508 2.7 mL/g-VS | 471 3.5 mL/g-VS | 493 1.7 mL/g-VS |
| Condensate VS reduction after AD | ~35% | ~33% | ~31% |
| Condensate soluble COD reduction after AD | ~65% | ~60% | ~62% |
